# Supplementary material
Source: PubMed Central journal article supplement (PMC9148635)
Supplement: ede-33-450-s001.pdf [file ede-33-450-s001.pdf]

Use of recently vaccinated individuals to detect bias in test-negative case-control studies of  
COVID-19 vaccine effectiveness

Supplementary Material

Hitchings et al

**Supplementary Methods**

*Derivation of bias-indicator*

The odds ratio comparing vaccination status between cases and controls is given by

$$\begin{aligned} OR_U^R(t) &= \frac{C_{R+}(t)C_{U-}(t)}{C_{R-}(t)C_{U+}(t)} \\ &= \frac{\pi_- \lambda_- [\mu_U \alpha_{U-} (1-v)t + \mu_P \alpha_{P-} v T_V] P}{\pi_+ [\mu_U (1 - e^{-\alpha_{U+} \lambda_+ t}) (1-v) + \mu_P (1 - e^{-\alpha_{P+} \lambda_+ T_V}) v] P} \frac{\pi_+ \mu_R (1 - e^{-\alpha_{R+} \lambda_+ T_P}) v P}{\pi_- \mu_R \alpha_{R-} \lambda_- T_P v P} \\ &\approx \frac{\alpha_{R+} [\mu_U \alpha_{U-} (1-v)t + \mu_P \alpha_{P-} v T_V]}{\alpha_{R-} [\mu_U \alpha_{U+} (1-v)t + \mu_P \alpha_{P+} v T_V]}, \end{aligned}$$

as  $1 - e^{-x} \approx x$  when  $x$  is small.

*Derivation of bias-corrected vaccine effectiveness estimate*

The odds ratio comparing vaccination status between cases and controls is given by

$$\begin{aligned} 1 - OR_R^F(t) &= 1 - \frac{C_{F+}(t)C_{R-}(t)}{C_{F-}(t)C_{R+}(t)} \\ &= 1 - \left( \frac{\pi_+ \mu_V [(1-\varphi)(1 - e^{-\alpha_{V+} \lambda_+ (t-T_P - T_V)}) + \varphi(1 - e^{-\alpha_{V+} \theta \lambda_+ (t-T_P - T_V)})] v P}{\pi_+ \mu_V (1 - e^{-\alpha_{V+} \lambda_+ T_P}) v P} \right) \frac{\pi_- \mu_V \alpha_{V-} \lambda_- T_P v P}{\pi_- \mu_V \alpha_{V-} \lambda_- (t - T_P - T_V) v P} \\ &\approx 1 - \left( \frac{[(1-\varphi)\alpha_{V+} \lambda_+ (t - T_P - T_V) + \varphi \alpha_{V+} \theta \lambda_+ (t - T_P - T_V)]}{(\alpha_{V+} \lambda_+ T_P)} \right) \frac{T_P}{(t - T_P - T_V)} \\ &= \varphi(1 - \theta). \end{aligned}$$

Again,  $1 - e^{-x} \approx x$  when  $x$  is small.

*Derivation of bias-corrected vaccine effectiveness estimate with varying  $T_V$*

If vaccination occurred on a set of days  $T_{Vj}$ , and a proportion  $p_j$  of vaccinated individuals is vaccinated on each vaccination day, then

$$\begin{aligned} C_{F+}(t) &= \sum_j C_{F+}(t|T_V = T_{Vj}) p_j \\ C_{F-}(t) &= \sum_j C_{F-}(t|T_V = T_{Vj}) p_j \end{aligned}$$

Expressions for  $C_{R+}(t)$  and  $C_{R-}(t)$  are independent of  $T_v$ , and therefore remain as in the main text. Thus,

$$\begin{aligned}
1 - OR_R^F(t) &= 1 - \frac{C_{F+}(t)C_{R-}(t)}{C_{F-}(t)C_{R+}(t)} \\
&= 1 - \left( \frac{\sum_j [(1 - \varphi) (1 - e^{-\alpha_{V+}\lambda_+(t-T_P-T_{Vj})}) + \varphi (1 - e^{-\alpha_{V+}\theta\lambda_+(t-T_P-T_{Vj})})] p_j}{(1 - e^{-\alpha_{V+}\lambda_+T_P})} \right) \frac{T_P}{\sum_j (t - T_P - T_{Vj}) p_j} \\
&\approx 1 - \left( \frac{\alpha_{V+}\lambda_+ [(1 - \varphi) + \varphi\theta] \sum_j (t - T_P - T_{Vj}) p_j}{\alpha_{V+}\lambda_+ T_P} \right) \frac{T_P}{\sum_j (t - T_P - T_{Vj}) p_j} \\
&= \varphi(1 - \theta).
\end{aligned}$$
